# Supplementary material for: Multiplatform modeling of atrial fibrillation identifies phospholamban as a central regulator of cardiac rhythm
Source: PubMed Central journal article supplement (PMC10387351; doi:10.1242/dmm.049962), 2023-07-17
Supplement: dmm-16-049962-s1.pdf [file dmm-16-049962-s1.pdf]

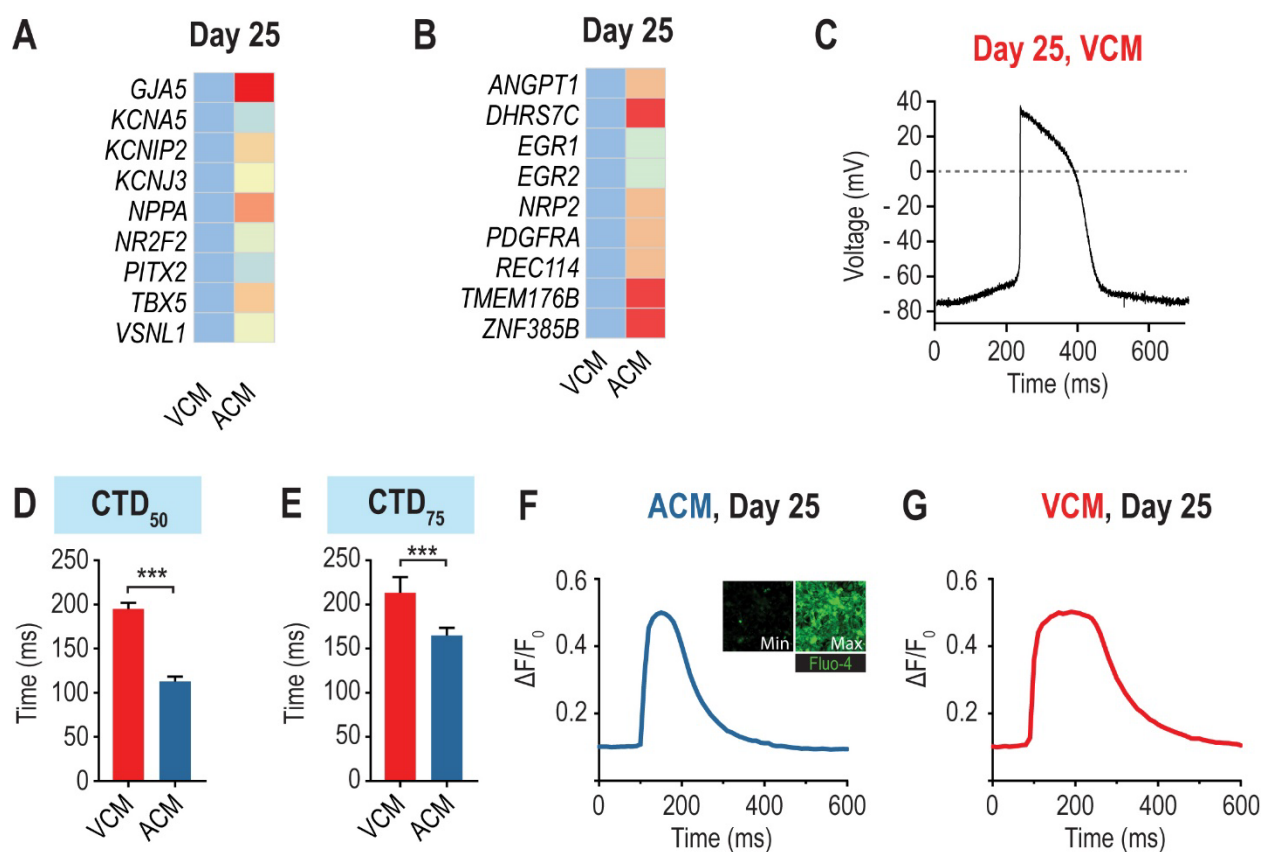

**Fig. S1. Gene expression and functional characterization of ACMs.** (A & B) Heatmap of atrial genes enriched in day 25 ACMs as compared to VCMs. (C) Patch-clamp experiments show that VCMs generate action potential with ventricular characteristics, including a long phase 2. (D,E) Quantification of average CTD50 and CTD75 demonstrate that ACMs display shorter calcium transients than VCMs. P-value \*\*\* < 0.001. (F,G) Representative calcium transient traces for ACMs and VCMs respectively.

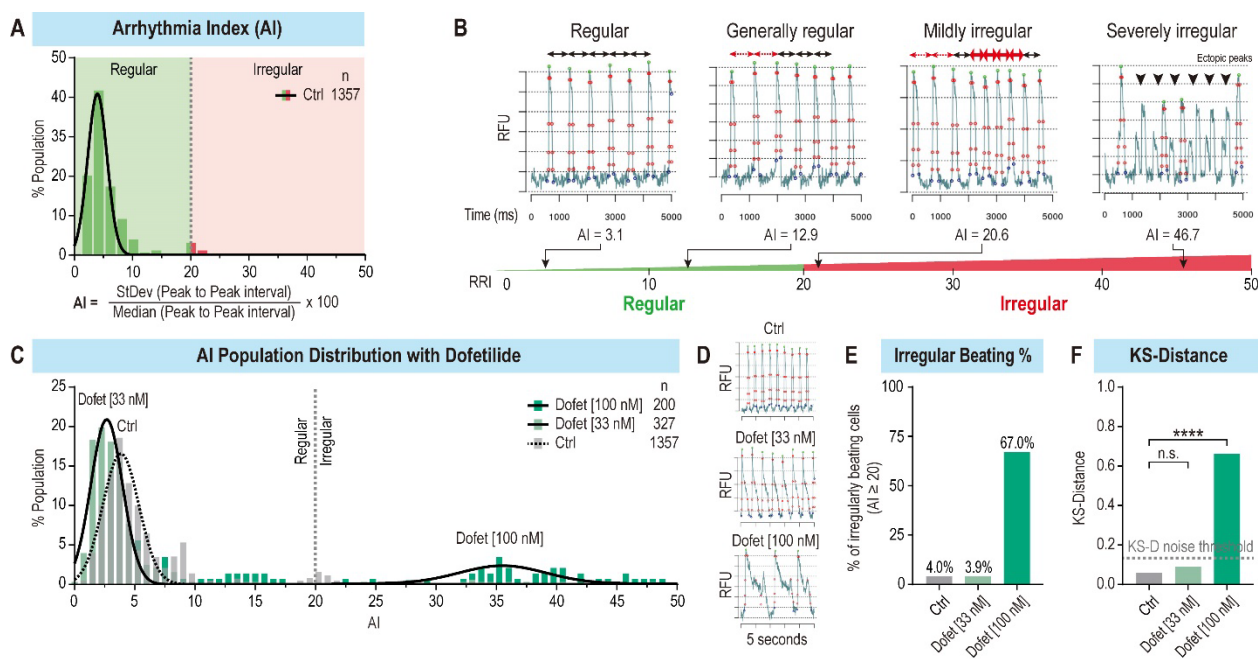

**Fig. S2. Quantification of rhythm parameters in ACMs.** (A) Example of histogram with Arrhythmia Index (AI) values showing cells with AI < 20: not arrhythmic or AI > 20 arrhythmic. (B) Examples of peak trains from ACMs with regular (left), mildly irregular (middle), and severely irregular (right) with their respective AI score. (C) Histogram representing the distribution of AI values for ACMs treated with increasing doses of Dofetilide. (D) Representative peak trains of control ACMs (top), ACMs treated with 33 nM Dofetilide (middle), and ACMs treated with 100 nM Dofetilide (bottom). (E) Histogram representing the proportion of arrhythmic cells (AI > 20) in control ACMs and ACMs treated with 33 nM and 100 nM Dofetilide. (F) Quantification of KS-D between control or Dofetilide-treated ACMs conditions. P-value \*\*\* < 0.0001.

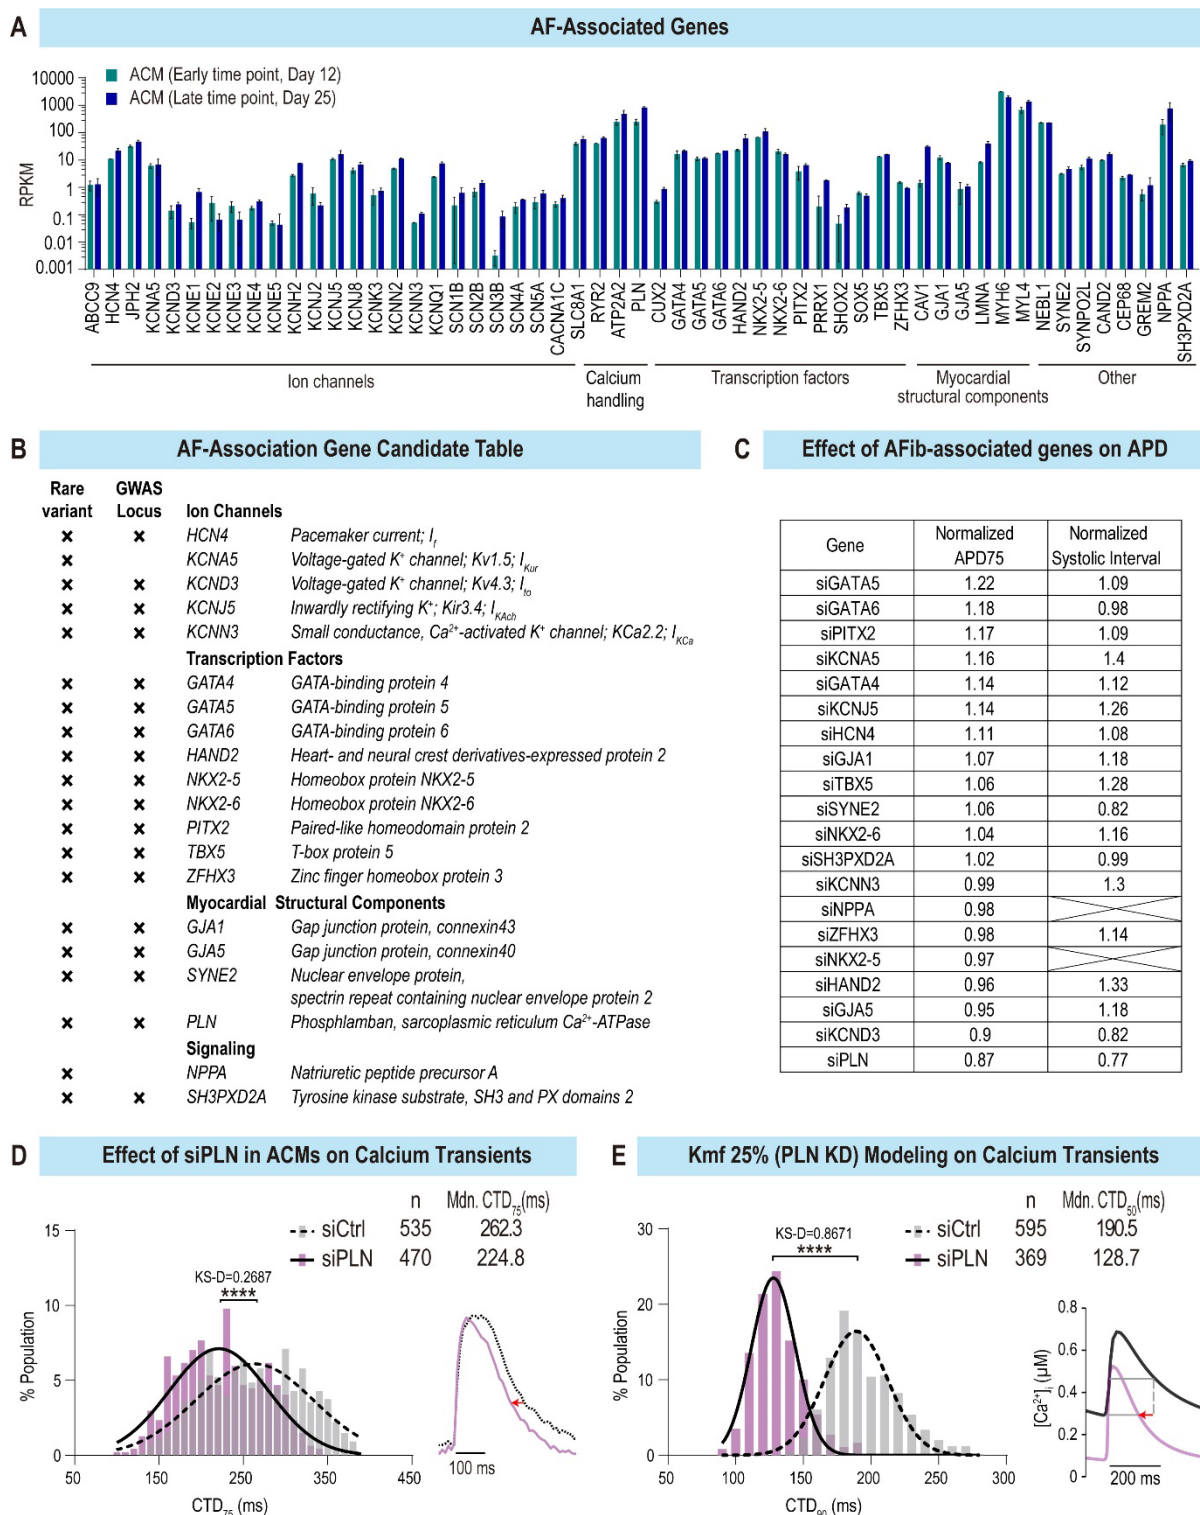

**Fig. S3. Selection of AF-associated genes for phenotypical characterization using our novel HT platform. (A)** Histogram representing expression level (RPKM) of previously known AF-associated genes using RNAseq data from Day 12 and Day 25 ACMs. **(B)** Selection of 20 AF-genes harboring rare variant in familial AF studies and/or SNPs reported in GWAS studies. **(C)** Numerical values of data presented in heat map

in Fig.3A. APD75 and systolic Intervals were normalized to their respective controls. In flies there is no homolog for NPPA and tinman/Nkx2.5 KD flies fail to develop hearts. **(D)** Histogram showing the distribution of calcium transient duration (CTD) values in siControl and siPLN condition in ACMs (right) and representative single calcium transients for both conditions (left). **(E)** Histogram of CTD generated from HAMs (left) and representative traces (right) in response to Kmf25% condition (=PLN KD). P-value \*\*\* < 0.0001.

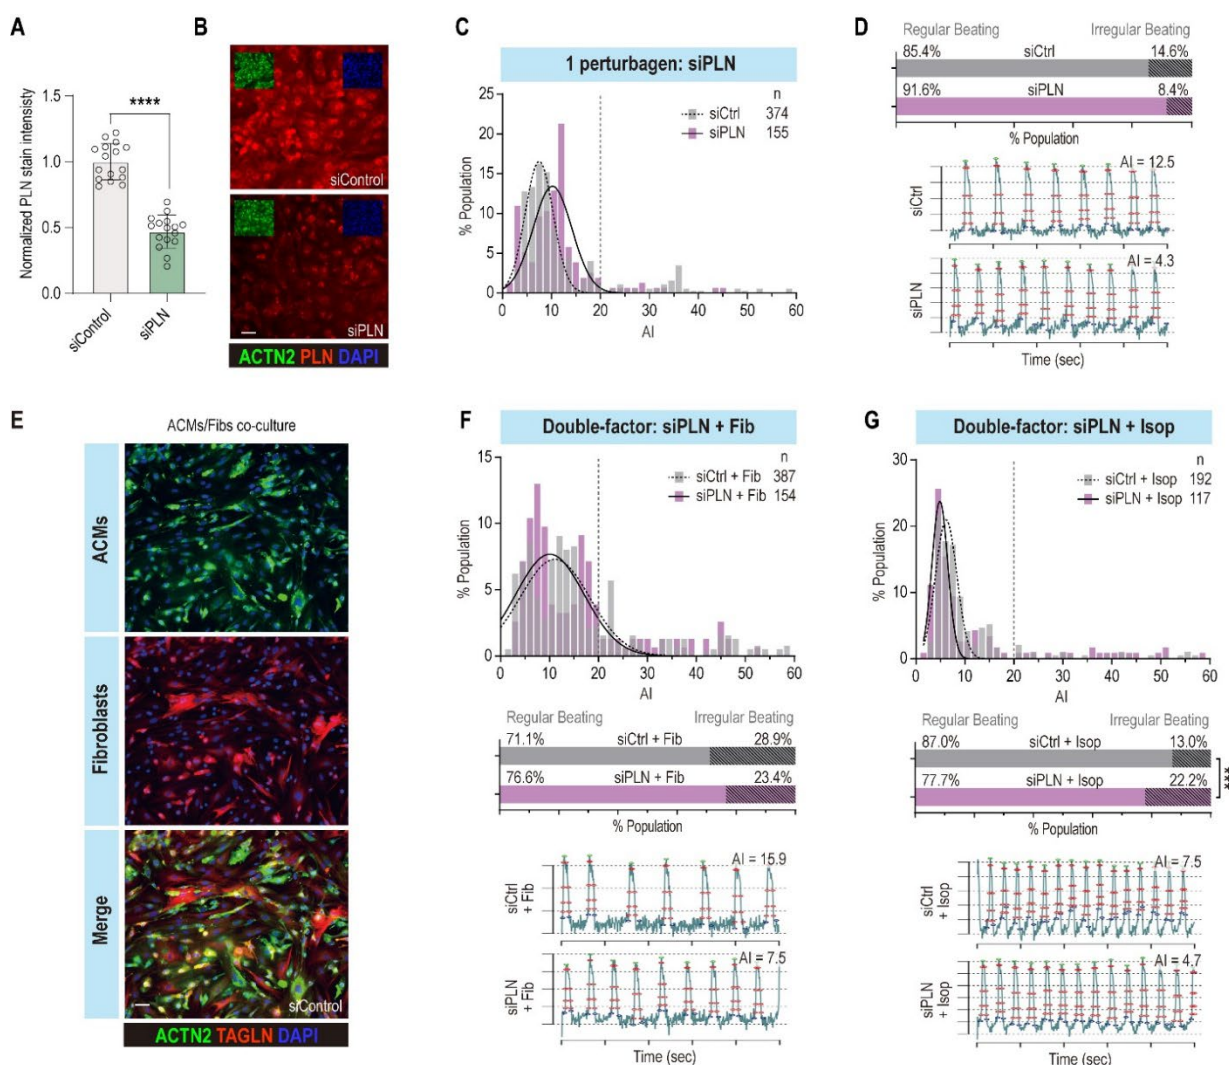

**Fig. S4. Testing of multiple perturbagens to trigger arrhythmia in ACMs.** (A) Histogram showing the quantification of PLN staining intensity in siControl and siPLN conditions in ACMs. (B) Representative images of ACMs stained for actinin2 (ACTN2, green) to mark ACMs and for phospholamban (PLN, red) showing a significant reduction of PLN protein levels upon PLN KD. (C) Histogram showing the distribution of AI values from ACMs in siControl and siPLN conditions. (D) Quantification of irregular AP peak train (top). Representative AP traces in siControl and siPLN conditions. (E) Representative images of ACMs co-cultured with human dermal fibroblasts and stained with ACTN2 (cardiac, green) and TAGLN (fibroblasts, red). (F) Histogram showing the distribution of AI values from ACMs co-cultured with fibroblasts (Fib) in siControl and siPLN conditions (top). (Middle) Quantification of the percentage of ACMs with irregular AP peak trains for each condition. (Bottom) Representative AP peak trains for each condition. (G) Histogram showing the distribution of AI values from ACMs treated with Isop in siControl and siPLN conditions (top). (Middle) Quantification of the percentage of ACMs with irregular AP peak trains for each condition. (Bottom) Representative AP peak trains for each condition.

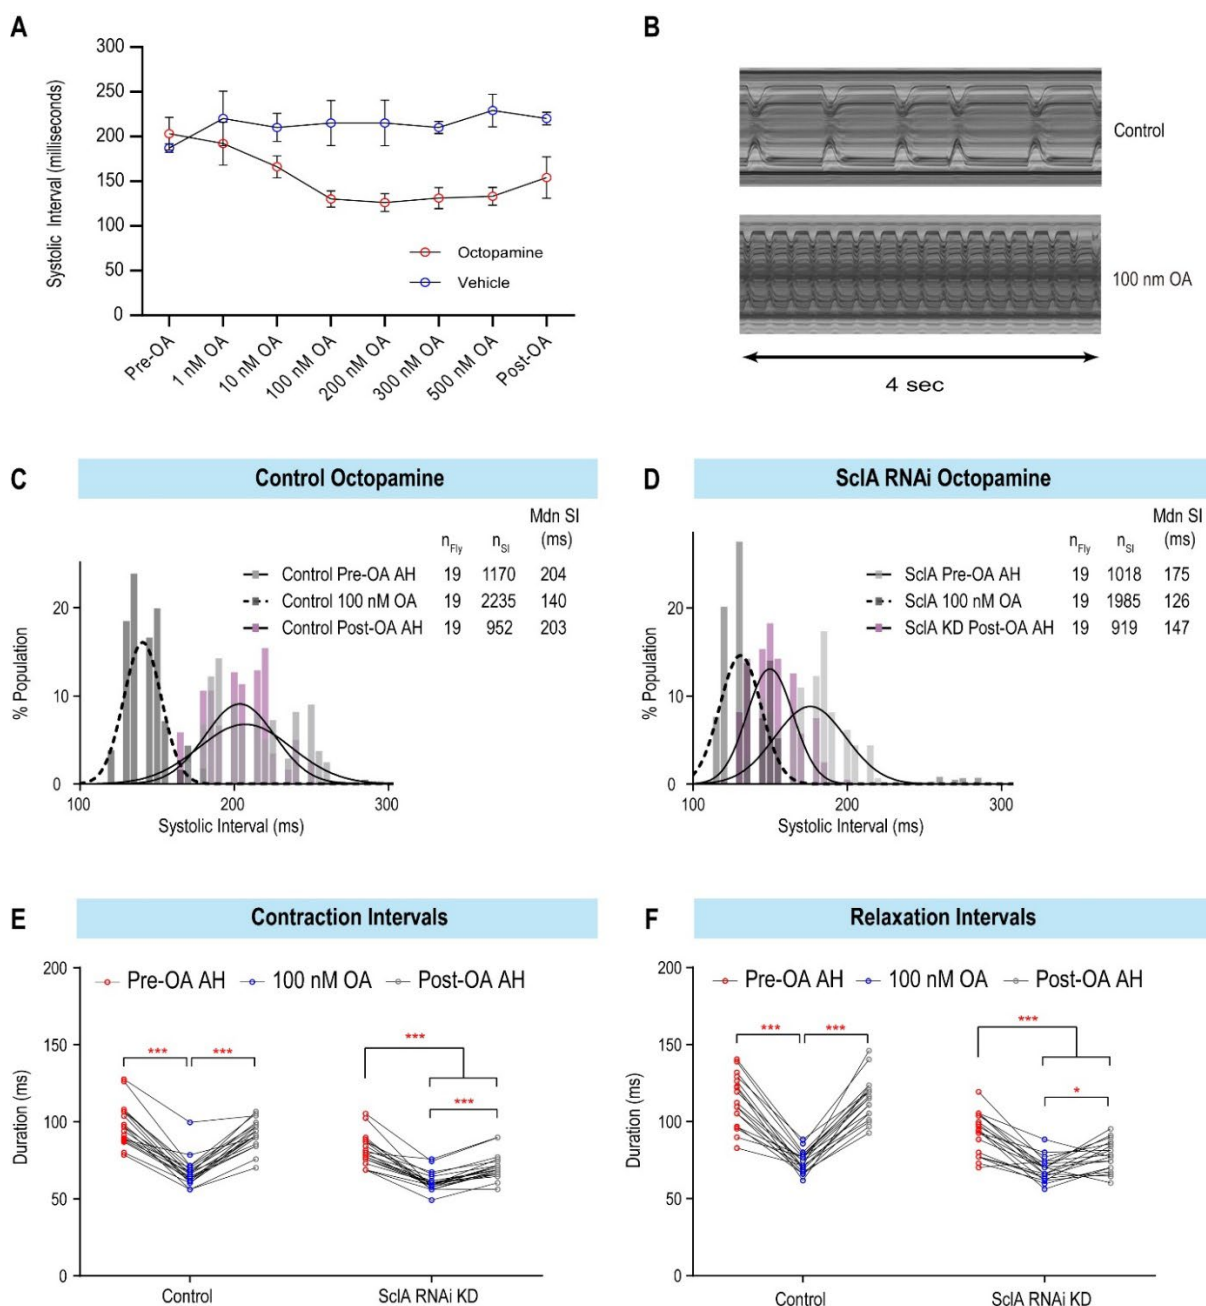

**Fig. S5. Optimization of octopamine treatment in flies** (A) Graph showing average SI values in response to escalating doses of OA in flies. (B) Representative M-modes from one heart before (top) and during application of 100nM OA (bottom) showing dramatic increases in heart rate. (C) Histograms showing the distribution of SI values in control hearts pre-OA pacing, during exposure to 100nM OA, and 15 min post-OA application. Distribution of SIs post-OA returns to that of pre-OA. (D) showing the distribution of SI values in ScIA KD hearts pre-OA pacing, during exposure to 100nM OA, and 15 min post-OA application. Distribution of SIs post-OA are significantly shorter compared to pre-OA and are due to decreases in both (E) the contraction and (F) relaxation phases of the systolic intervals (p-value < 0.05, repeated measures 2-way ANOVA).

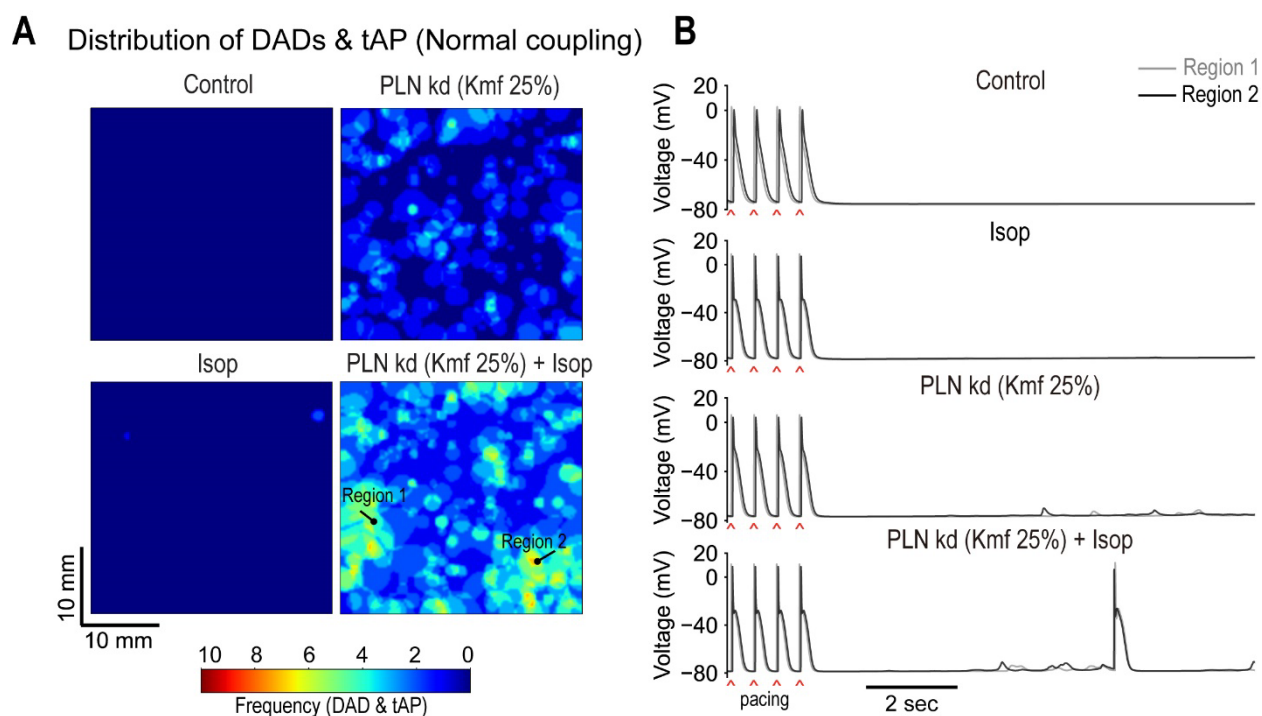

**Fig. S6. Effects of PLN kd (Kmf 25%) and Isop on the triggered activity in heterogeneous human atrial tissue with normal cell-to-cell coupling.** Tissue was paced at 2 Hz for 10 s followed by a period of 10 s without stimulation. **(A)** Spatial distribution of DADs and tAPs in the atrial tissue for PLN KD (Kmf 25%) and after Isop treatment. **(B)** Superimposed traces of APs from two regions (marked in panel **A**) of the atrial tissue with normal cell-to-cell coupling for each perturbation.

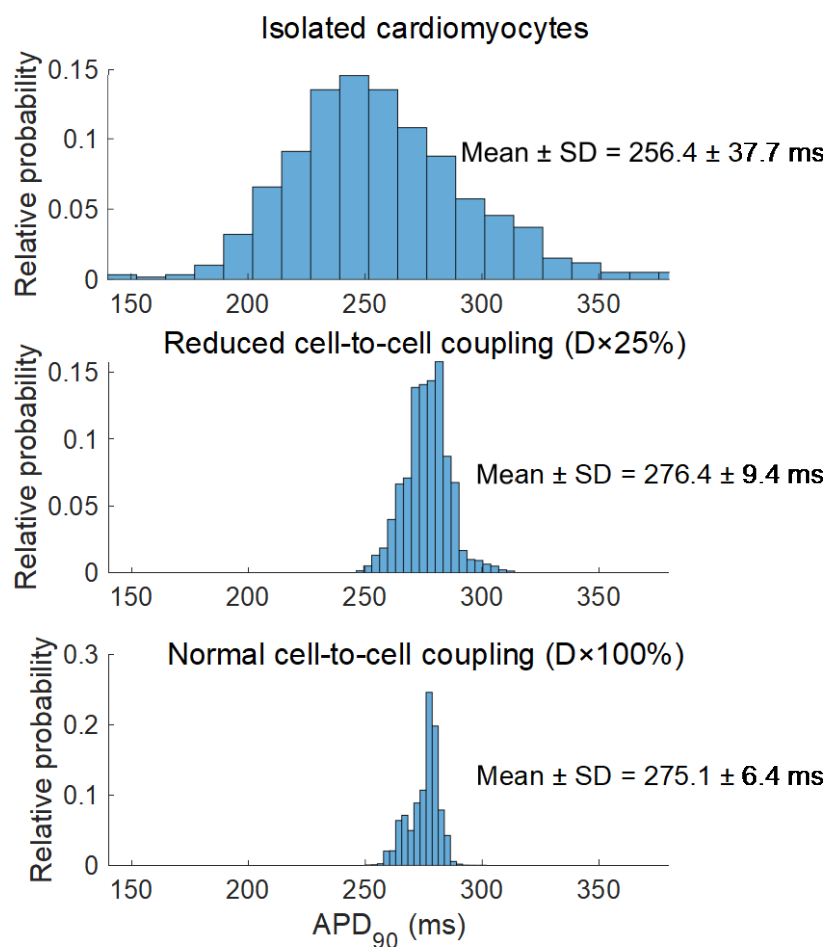

**Fig. S7. Normalized histogram plot illustrating distribution of APD<sub>90</sub> for the human atrial population of (top) isolated cardiomyocytes and coupled cardiomyocytes in tissue with (middle) reduced, or (bottom) normal cell-to-cell coupling. The mean and SD values are indicated in each panel.**



**Table S1. Human AF candidate genes tested in ACMs (Fig. S2) are shown with their *Drosophila* orthologs.** Studies demonstrating the presence and/or function of these orthologs in the fly heart are listed and genes common to both ACMs and fly hearts are bolded. Data from tissue-specific RNA Seq analysis and curated in FlyAtlas2 (<https://flyatlas.gla.ac.uk/FlyAtlas2/>) shows cardiac expression for approximately half of the genes in the table (indicated by +). Note that many of the ion channels and transcription factors (TF) that have been shown to be functional in the heart did not show up in the Fly Atlas dataset and none showed up in the cardiac proteomic analysis by Cammarato et al (2011, PMID: 21541028), likely because expression in the heart is too low relative to other structural genes (e.g. Myosin heavy chain, Mhc).

| CATEGORY   | GENE                 | FLY ORTHOLOG                      | Reference                                                                                                             | FlyAtlas2     |
|------------|----------------------|-----------------------------------|-----------------------------------------------------------------------------------------------------------------------|---------------|
| CHANNEL    | <b>ABCC9</b>         | <b>dSur</b>                       | Akasaka, et al 2006 -PMID: 16882722; Eleftherianos et al, 2011 - PMID: 21719711                                       | -             |
| CHANNEL    | <b>HCN4</b>          | <b>Ih</b>                         | Monier, et al, 2005 - PMID 16284119                                                                                   | +             |
| CHANNEL    | <b>JPH2</b>          | <b>junctophilin</b>               |                                                                                                                       | +             |
| CHANNEL    | <b>KCNA5</b>         | <b>Shaker</b>                     | Ocorr et al, 2017 - PMID: 28542428                                                                                    | -             |
| CHANNEL    | <b>KCND3</b>         | <b>Shal</b>                       | Ocorr et al, 2017 - PMID: 28542428                                                                                    | -             |
| CHANNEL    | KCNE1 - 5            | No ortholog                       | KCNQ works without MinK                                                                                               |               |
| CHANNEL    | <b>KCNH2</b>         | <b>seizure</b>                    | Ocorr et al, 2017 - PMID:28542428                                                                                     | -             |
| CHANNEL    | <b>KCNJ2, 5, 8</b>   | <b>Irk</b>                        | Ocorr et al, 2017 - PMID:28542428                                                                                     | -             |
| CHANNEL    | <b>KCNK3</b>         | <b>ork / sandman</b>              | LaLevee et al – PMID: 16890525<br>Klassen et al - PMID: 28328397                                                      | - / -         |
| CHANNEL    | <b>KCNN2, 3</b>      | <b>SK</b>                         |                                                                                                                       | +             |
| CHANNEL    | <b>KCNMA</b>         | <b>BK – not tested in ACMs?</b>   | Pineda et al, - PMID: 33629867                                                                                        | +             |
| CHANNEL    | <b>KCNQ1</b>         | <b>KCNQ</b>                       | Ocorr et al, 2007 - PMID: 17360457                                                                                    | -             |
| CHANNEL    | <b>RYR2</b>          | <b>RyR</b>                        | Lin et al, PMID: 21493892                                                                                             | +             |
| CHANNEL    | <b>SCN1 - 5</b>      | <b>nap</b>                        | Dowse et al, PMID: 8719771<br>Ganetsky, PMID: 2420953                                                                 | +             |
| TF         | <b>CUX2</b>          | <b>cut</b>                        | Blochlinger et al, PMID 8330519<br>Zappia et al, PMID 32815271                                                        | -             |
| TF         | <b>GATA4 / 5 / 6</b> | <b>pnr / grn / GATAd</b>          | Klinedinst & Bodmer, 2003 - PMID: 12756184                                                                            | + / + / +     |
| TF         | <b>HAND2</b>         | <b>Hand</b>                       | Kolsch and Paululat, 2002 - PMID: 12424518<br>Jonhson et al 2011 - PMID: 21965617                                     | +             |
| TF         | <b>NKX2-5 / 2-6</b>  | <b>tin</b>                        | Bodmer et al 1990 - PMID: 7915669                                                                                     | -             |
| TF         | PITX2                | Ptx1                              |                                                                                                                       | -             |
| TF         | PRRX1                | CG9876                            |                                                                                                                       | -             |
| TF         | SHOX2                | CG34367                           |                                                                                                                       | -             |
| TF         | <b>SOX5</b>          | <b>Sox102F</b>                    |                                                                                                                       | +             |
| TF         | <b>TBX5</b>          | <b>Bifid / Doc1 / Doc2 / Doc3</b> | Bi - Ahmad et al 2012 - PMID: 22814603<br>DOC -Reim et al 2003 - PMID: 12783790<br>Berkeley Drosophila Genome Project | - / - / - / - |
| TF         | ZFH3                 | zfh2                              |                                                                                                                       | -             |
| MYOCARDIAL | CAV1                 | No ortholog                       |                                                                                                                       |               |
| MYOCARDIAL | <b>GJA1</b>          | <b>CG11459 / 26-29-p / CG4847</b> | Cammarato et al 2011 - PMID: 21541028                                                                                 | +             |
| MYOCARDIAL | GJA5                 | No ortholog                       |                                                                                                                       |               |
| MYOCARDIAL | <b>LMNA</b>          | <b>LamC / Lam</b>                 | Cammarato et al 2011 - PMID: 21541028                                                                                 | +             |

|            |                 |                         |                                                                                  |       |
|------------|-----------------|-------------------------|----------------------------------------------------------------------------------|-------|
| MYOCARDIAL | <b>MYH6</b>     | <b>Mhc</b>              | Lovato et al, 2002 - PMID: 12397110<br>Cammarato et al, 2011 - PMID:<br>21541028 | +     |
| MYOCARDIAL | <b>MYL4</b>     | <b>Mlc-c / Mlc1</b>     | Cammarato et al 2011 - PMID:<br>21541028                                         | +     |
| MYOCARDIAL | <b>NEBL</b>     | <b>Lasp</b>             | Cammarato et al 2011 - PMID:<br>21541028                                         | +     |
| MYOCARDIAL | <b>SYNE2</b>    | <b>Msp300</b>           | Cammarato et al 2011 - PMID:<br>21541028                                         | +     |
| MYOCARDIAL | <b>SYNPO2L</b>  | <b>CG1674</b>           | Cammarato et al 2011 - PMID:<br>21541028                                         | +     |
| OTHER      | <b>C9ORF3</b>   | <b>CG10602</b>          |                                                                                  | +     |
| OTHER      | <b>CAND2</b>    | <b>Cand1</b>            |                                                                                  | +     |
| OTHER      | CEP68           | No ortholog             |                                                                                  |       |
| OTHER      | GREM2           | No ortholog             |                                                                                  |       |
| OTHER      | <b>NEURL</b>    | <b>neur</b>             |                                                                                  | +     |
| OTHER      | NPPA            | No ortholog             |                                                                                  |       |
| OTHER      | <b>SH3PXD2A</b> | <b>cindr / Nipped-A</b> | Cammarato et al 2011 - PMID:<br>21541028                                         | + / + |

**Table S2. Screen results in ACMs.** Table displays Median, Normalized Median, KS-D and P- values related to Fig.3A.

| Gene ID | Mdn.<br>APD75 | Norm<br>Median<br>APD75 | KSD     | P-value<br>of KS-D |
|---------|---------------|-------------------------|---------|--------------------|
| Ctrl    | 133.6         | 1                       |         |                    |
| GATA4   | 151.8         | 1.136227545             | 0.1577  | <0.0001            |
| GATA5   | 162.6         | 1.217065868             | 0.2691  | <0.0001            |
| GATA6   | 157.8         | 1.181137725             | 0.2482  | <0.0001            |
| GJA1    | 142.5         | 1.066616766             | 0.05343 | 0.0019             |
| GJA5    | 127.4         | 0.953592814             | 0.2149  | <0.0001            |
| HAND2   | 127.6         | 0.95508982              | 0.2466  | <0.0001            |
| HCN4    | 148.4         | 1.110778443             | 0.1756  | <0.0001            |
| KCNA5   | 155.5         | 1.163922156             | 0.2014  | <0.0001            |
| KCND3   | 119.6         | 0.895209581             | 0.2371  | <0.0001            |
| KCNJ5   | 152.4         | 1.140718563             | 0.1893  | <0.0001            |
| KCNN3   | 132.4         | 0.991017964             | 0.1503  | <0.0001            |
| NKX2-5  | 129.9         | 0.972305389             | 0.1762  | <0.0001            |
| NKX2-6  | 138.3         | 1.035179641             | 0.04106 | 0.0275             |
| NPPA    | 131.4         | 0.983532934             | 0.1047  | <0.0001            |
| PITX2   | 156           | 1.167664671             | 0.2053  | <0.0001            |
| PLN     | 116.1         | 0.869011976             | 0.3305  | <0.0001            |

**Table S3. Screen results in flies.** Table displays Normalized systolic interval (SI), standard deviations and P values related to Fig.3A.

| fly_gene | Norm SI    | Deviations | P-Value               |
|----------|------------|------------|-----------------------|
| Sh       | 1.40333138 | 0.40333138 | 6.91 <sup>E</sup> -10 |
| Hand     | 1.32601473 | 0.32601473 | 2.52 <sup>E</sup> -09 |
| SclA     | 0.77328487 | 0.22671513 | 4.93 <sup>E</sup> -09 |
| Sk       | 1.25795515 | 0.25795515 | 4.99 <sup>E</sup> -08 |
| Doc1     | 1.26981919 | 0.26981919 | 4.57 <sup>E</sup> -07 |
| Pnr      | 1.12001245 | 0.12001245 | 5.21 <sup>E</sup> -06 |
| Shal     | 0.81835564 | 0.18164436 | 1.31 <sup>E</sup> -05 |
| Irk3     | 1.30245197 | 0.30245197 | 1.55 <sup>E</sup> -05 |
| shakb    | 1.15642458 | 0.15642458 | 1.18 <sup>E</sup> -04 |
| Scro     | 1.16119611 | 0.16119611 | 0.00021027            |
| MSP300   | 0.81943812 | 0.18056188 | 0.00046931            |
| Ih       | 1.07869321 | 0.07869321 | 0.01360059            |
| Ptx1     | 1.08533093 | 0.08533093 | 0.0543814             |
| Zfh-2    | 1.14018008 | 0.14018008 | 0.08787157            |
| Cindr    | 0.9867872  | 0.0132128  | 0.71808748            |

**Table S4. Glossary for model parameters that were perturbed for constructing populations of human atrial models.**

| Parameter      | Note                                                             |
|----------------|------------------------------------------------------------------|
| $G_{Na}$       | Fast $Na^+$ current, maximal conductance                         |
| $G_{CaL}$      | L-type $Ca^{2+}$ current, maximal conductance                    |
| $G_{to}$       | Transient outward $K^+$ current, maximal conductance             |
| $G_{Kur}$      | Ultra-rapid delayed rectifier $K^+$ current, maximal conductance |
| $G_{Kr}$       | Rapid delayed rectifier $K^+$ current, maximal conductance       |
| $G_{Ks}$       | Slow delayed rectifier $K^+$ current, maximal conductance        |
| $G_{K1}$       | Inward rectifier $K^+$ current, maximal conductance              |
| $G_{Kp}$       | Conductance of the plateau $K^+$ current                         |
| $G_{NaB}$      | Background $Na^+$ current, maximal conductance                   |
| $G_{CaB}$      | Background $Ca^{2+}$ current, maximal conductance                |
| $G_{CaP}$      | Sarcoplasmic $Ca^{2+}$ pump current, maximal pump rate           |
| $G_{ClCa}$     | $Ca^{2+}$ activated $Cl^-$ current, maximal conductance          |
| $G_{ClB}$      | Background $Cl^-$ current, maximal conductance                   |
| $V_{NCX}$      | $Na^+/Ca^{2+}$ exchange current, maximal exchange rate           |
| $V_{NaK}$      | $Na^+/K^+$ pump current, maximal pump rate                       |
| $V_{SERCA}$    | Rate of the SERCA pump                                           |
| $V_{RyR,Rel}$  | Rate of the SR $Ca^{2+}$ release via ryanodine receptors         |
| $V_{RyR,Leak}$ | Rate of the SR $Ca^{2+}$ leak via ryanodine receptors            |

**Table S5. Conduction velocity measured in the 2D tissue.**

| Pacing rate                             | Conduction velocity |          |
|-----------------------------------------|---------------------|----------|
|                                         | 1 Hz                | 2 Hz     |
| Normal coupling<br>( $D \times 100\%$ ) | 0.63 m/s            | 0.41 m/s |
| Reduced coupling<br>( $D \times 25\%$ ) | 0.28 m/s            | 0.19 m/s |

**Table S6. Human AF candidate genes tested in the fly heart (Fig. S2) are listed with their human orthologs and the stock center ID number.**

| <u>Fly RNAi</u> | <u>Human Ortholog</u> | <u>Stock #</u> | <u>Stock #2</u> | <u>Source</u> |
|-----------------|-----------------------|----------------|-----------------|---------------|
| <b>Bifid</b>    | TBX 2,3               | 100598         | 330228          | VDRC          |
| <b>Cindr</b>    | SH3KBP1               | 38854          | 330411          | VDRC          |
| <b>Doc1</b>     | TBX6                  | 16746          | 104927          | VDRC          |
| <b>Doc2</b>     | TBX6                  | 103431         |                 | VDRC          |
| <b>Doc3</b>     | TBX6                  | 30550          | 104922          | VDRC          |
| <b>GATAd</b>    | GATA1                 | 100389         |                 | VDRC          |
| <b>GATAe</b>    | GATA4                 | 10418          |                 | VDRC          |
| <b>Grain</b>    | GATA2,3               | 105192         | 330376          | VDRC          |
| <b>Hand</b>     | Hand                  | 23306          | 330058          | VDRC          |
| <b>Ih</b>       | HCN2-4                | 110274         | 29574           | VDRC          |
| <b>Irk1</b>     | KCNJ2,4,12,18         | 107389         | 28431           | VDRC          |
| <b>Irk2</b>     | KCNJ2,4,12,18         | 4341           | 108140          | VDRC          |
| <b>Irk3</b>     | KCNJ10,15             | 3886           | 101174          | VDRC          |
| <b>MSP300</b>   | SYNE1                 | 107183         | 25906           | VDRC          |
| <b>Pnr</b>      | GATA4,5,6             | 6224           | 101522          | VDRC          |
| <b>Pnr</b>      | GATA4,5,6             | 34659          | 33744           | BDSC          |
| <b>Ptx1</b>     | Ptx1-3                | 19831          | 107785          | VDRC          |
| <b>SclA</b>     | PLN                   | 28957          |                 | BDSC          |
| <b>SclA/B</b>   | PLN                   | 62935          | 28957           | BDSC          |
| <b>Scro</b>     | NKX2.1,2,4            | 33902          | 330398          | VDRC          |
| <b>Sh</b>       | KCNA1-5               | 23673          | 104474          | VDRC          |
| <b>Shal</b>     | KCND1-3               | 103363         | 330383          | VDRC          |
| <b>Sk</b>       | KCNN1-3               | 2855           | 7052            | VDRC          |
| <b>Sk</b>       | KCNN1-3               | 27238          | 53881           | BDSC          |
| <b>Tin</b>      | NKX2.5                | 190512         | 101825          | VDRC          |
| <b>Twist</b>    | TWIST1, 2             | 37091          | 37092           | VDRC          |
| <b>Zfh-2</b>    | ZFH2-4                | 13305          | 110784          | VDRC          |

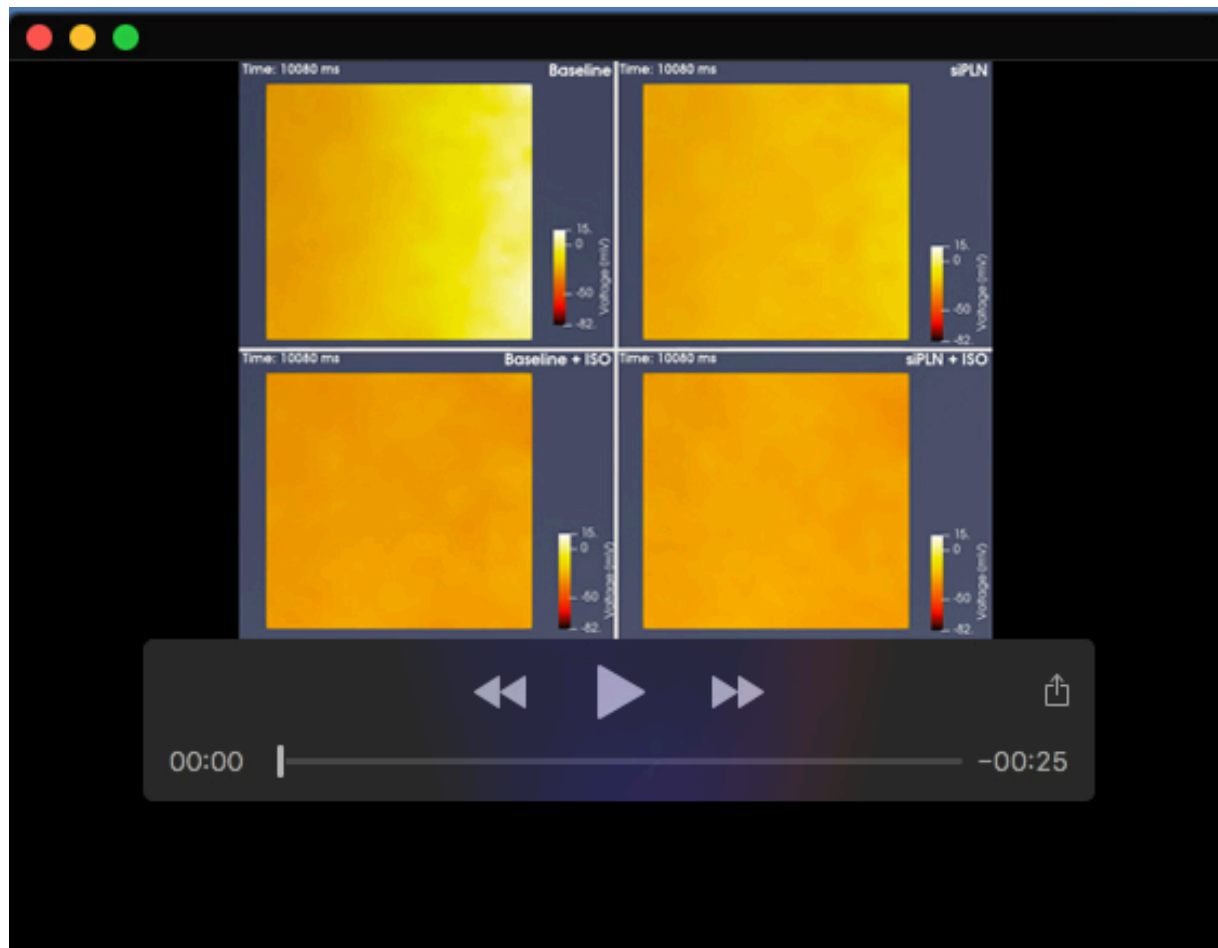

**Movie 1. Simulated tissue (normal tissue coupling) voltage map showing AP wave propagation elicited by the last pacing stimulus ( $t=10,000$  ms) and the membrane voltage activity thereafter.** Simulated conditions are: top left – baseline; bottom left – baseline + ISO; top right – PLN knockdown; bottom right – PLN knockdown + ISO.

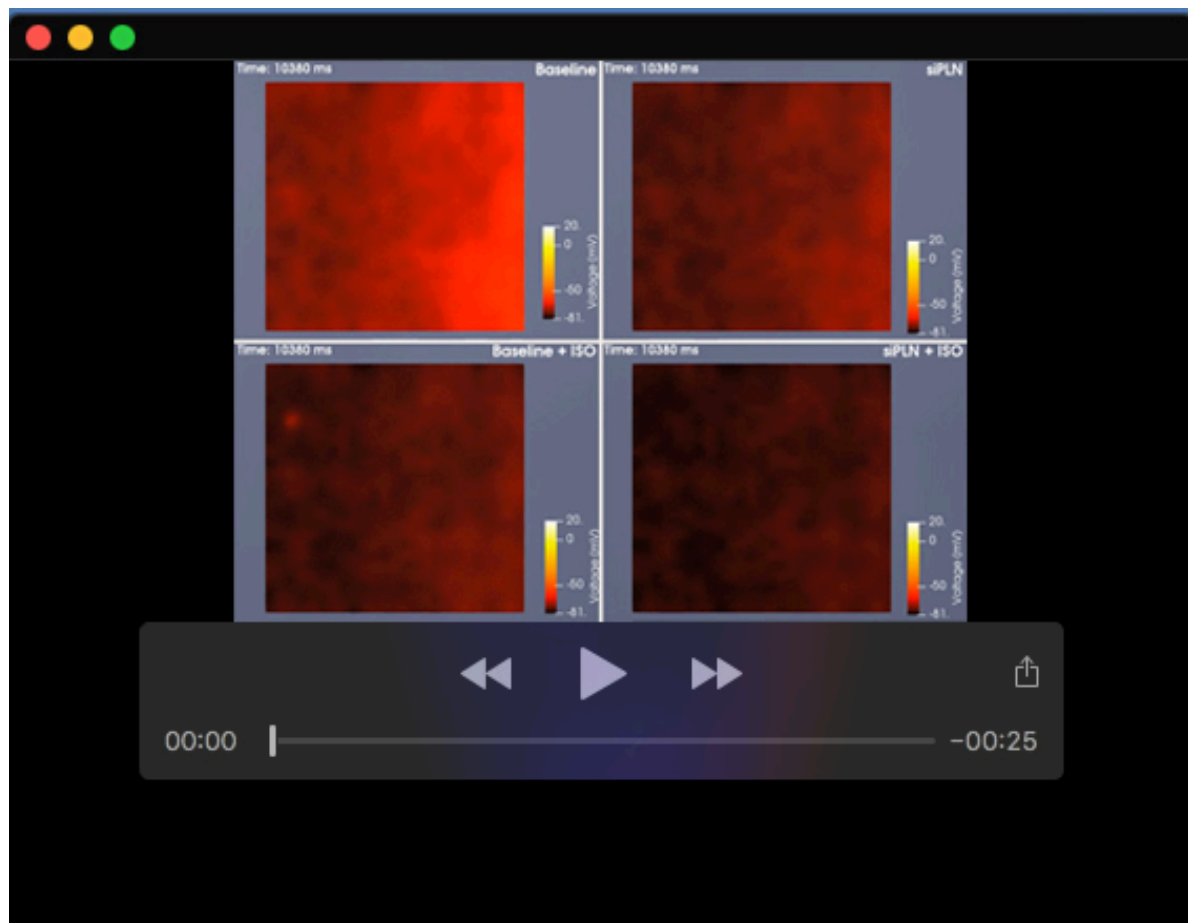

**Movie 2. Simulated tissue (reduced tissue coupling  $D \times 25\%$ ) voltage map showing AP wave propagation elicited by the last pacing stimulus ( $t=10,000$  ms) and the membrane voltage activity thereafter. Simulated conditions are: top left – baseline; bottom left – baseline + ISO; top right – PLN knockdown; bottom right – PLN knockdown + ISO.**
